# Supplementary material for: Support interactions dictated active edge sites over MoS2–carbon composites for hydrogen evolution
Source: Royal Society of Chemistry journal article supplement (doi:10.1039/c9nr09023a), 2019-12-05
Supplement: c9nr09023a1.pdf [file c9nr09023a1.pdf]

## *Supporting information for the manuscript*

### **Support Interactions Dictated Active Edge Sites over MoS<sub>2</sub>-Carbon Composites for Hydrogen Evolution**

*Xiaobin Qiu<sup>a,†</sup>, Yewei Huang<sup>a,†</sup>, Zhenzhen Nie<sup>a</sup>, Beibei Ma<sup>a</sup>, Yongwen Tan<sup>b</sup>, Zhenjun Wu<sup>\*a</sup>, Nan Zhang<sup>\*b</sup>, Xiuqiang Xie<sup>\*b</sup>*

*<sup>a</sup> College of Chemistry and Chemical Engineering, Hunan University, Changsha 410082, P. R. China. E-mail: wooawt@hnu.edu.cn.*

*<sup>b</sup> College of Materials Science and Engineering, Hunan University, Changsha 410082, P. R. China. E-mail: nanzhang@hnu.edu.cn; xiuqiang\_xie@hnu.edu.cn.*

<sup>†</sup>These authors contribute equally to this work.

#### **Contents list**

**Figure S1.** SEM images of pure MoS<sub>2</sub>.

**Figure S2.** AFM image of MoS<sub>2</sub>.

**Figure S3.** TGA curves of MoS<sub>2</sub>/rGO-1, MoS<sub>2</sub>/rGO-2, MoS<sub>2</sub>/CNT-1 and MoS<sub>2</sub>/CNT-2.

**Figure S4.** TEM images of (a) GO and (b) rGO after MSH treatment. TEM images of CNTs (c) before and (d) after MSH treatment.

**Figure S5.** SEM images of MoS<sub>2</sub>/rGO-2 at different reaction time: (a) 0 min, (b) 2 min, and (c) 4 min.

**Figure S6.** SEM images of MoS<sub>2</sub>/CNT-2 at different reaction time: (a) 0 min, (b) 2 min, and (c) 4 min.

**Figure S7.** SAED patterns of (a) MoS<sub>2</sub>/rGO-2, and (b) MoS<sub>2</sub>/CNT-2.

**Figure S8.** PL spectra of MoS<sub>2</sub>/rGO-2 and MoS<sub>2</sub>/CNT-2.

**Figure S9.** Polarization curves of CNT and rGO.

**Figure S10.** Faradaic efficiency of MoS<sub>2</sub>/CNT-2 at 20 mA/cm<sup>2</sup>.

**Figure S11.** Stability test for MoS<sub>2</sub>/CNT-2.

**Figure S12.** XPS spectra of (a) Mo 3d and S 2s peaks, and (b) S 2p peaks of MoS<sub>2</sub>/CNT-2 composites before and after HER tests.

**Figure S13.** Double-layer capacitance analyses for MoS<sub>2</sub>. (a) Cyclic voltammograms in the region of 0.1–0.4 V vs. RHE at different scan rates. (b) The plots of current densities against scan rates.  $\Delta j$  is the difference between anodic and cathodic current densities at 0.23 V vs. RHE. The same parameters are used for the tests below.

**Figure S14.** Double-layer capacitance analyses for MoS<sub>2</sub>/rGO-1.

**Figure S15.** Double-layer capacitance analyses for MoS<sub>2</sub>/rGO-2.

**Figure S16.** Double-layer capacitance analyses for MoS<sub>2</sub>/CNT-1.

**Figure S17.** Double-layer capacitance analyses for MoS<sub>2</sub>/CNT-2.

**Figure S18.** Nitrogen adsorption-desorption isotherms of (a) MoS<sub>2</sub>, (b) MoS<sub>2</sub>/rGO-1, (c) MoS<sub>2</sub>/rGO-2, (d) MoS<sub>2</sub>/CNT-1, and (e) MoS<sub>2</sub>/CNT-2. (f) BET surface areas of MoS<sub>2</sub>, MoS<sub>2</sub>/rGO-1, MoS<sub>2</sub>/rGO-2, MoS<sub>2</sub>/CNT-1 and MoS<sub>2</sub>/CNT-2 based on nitrogen adsorption-desorption isotherms.

**Figure S19.** Polarization curves of MoS<sub>2</sub>/CNT-3 and MoS<sub>2</sub>/CNT-4.

**Table S1** Representative top-down strategies to prepare 2D MoS<sub>2</sub>.

**Table S2** Comparison of some representative bottom-up strategies recently reported to prepare MoS<sub>2</sub>.

**Table S3** C 1s XPS results of GO and CNTs.

**Table S4** Electrocatalytic performances comparison of our MoS<sub>2</sub>-carbon composites with recent related literatures.

## References

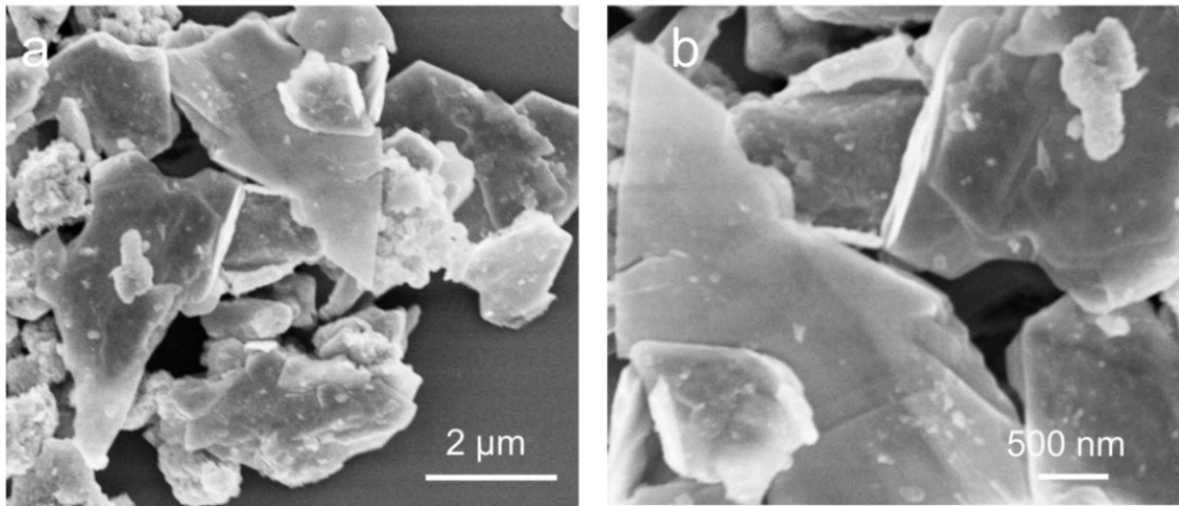

**Figure S1.** SEM images of pure MoS<sub>2</sub>.

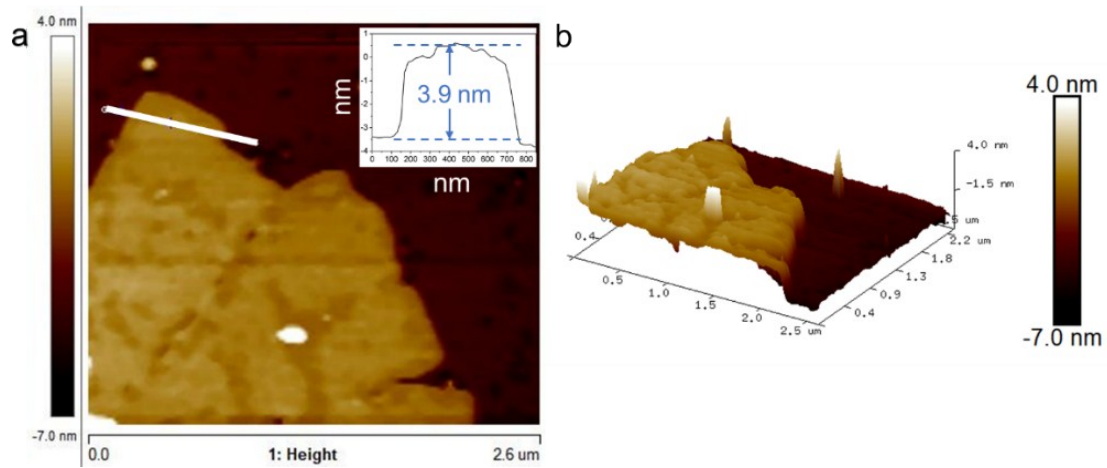

**Figure S2.** AFM image of MoS<sub>2</sub>.

From the AFM results (**Fig. S2**), the pure MoS<sub>2</sub> has a thickness of 3.9 nm, which is roughly the thickness of 6 layers of MoS<sub>2</sub>.

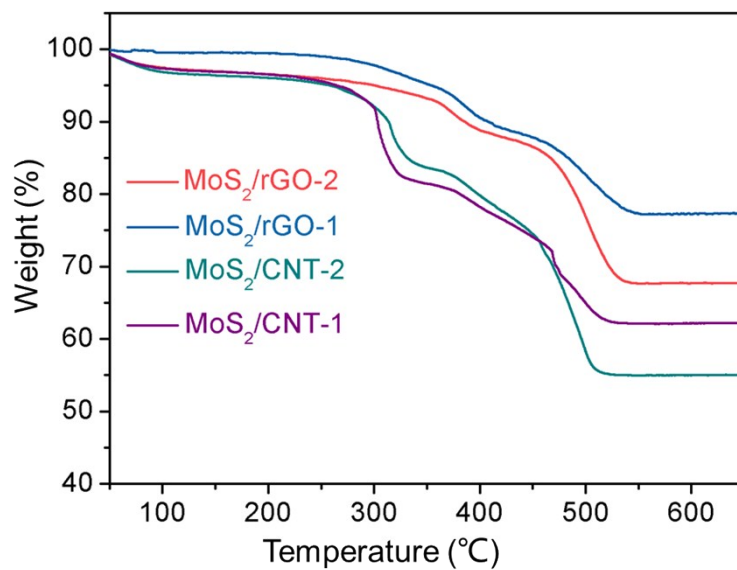

**Figure S3.** TGA curves of MoS<sub>2</sub>, MoS<sub>2</sub>/rGO-1, MoS<sub>2</sub>/rGO-2, MoS<sub>2</sub>/CNT-1 and MoS<sub>2</sub>/CNT-2.

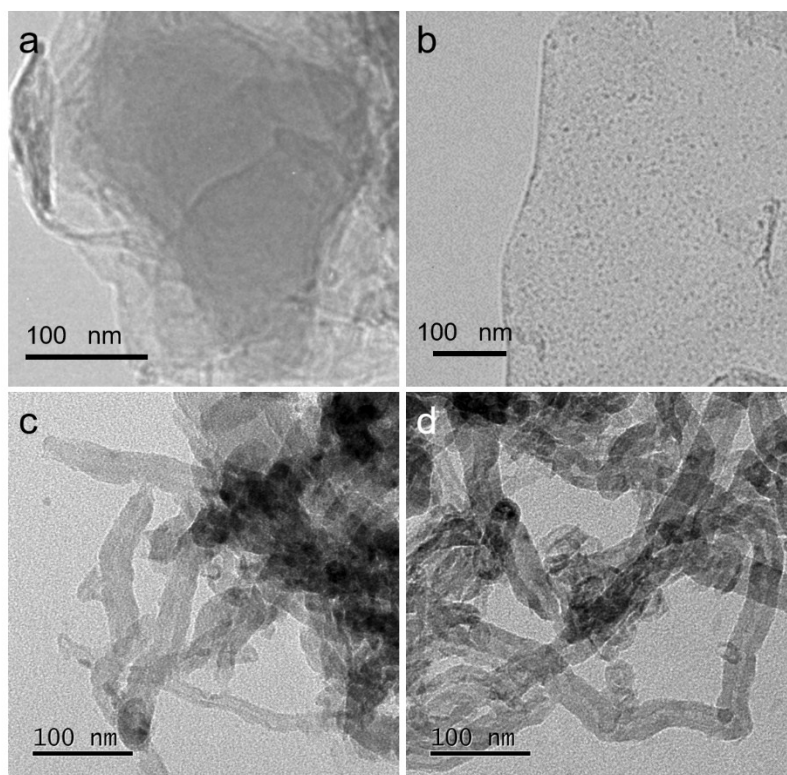

**Figure S4.** TEM images of (a) GO and (b) rGO after MSH treatment. TEM images of CNTs (c) before and (d) after MSH treatment.

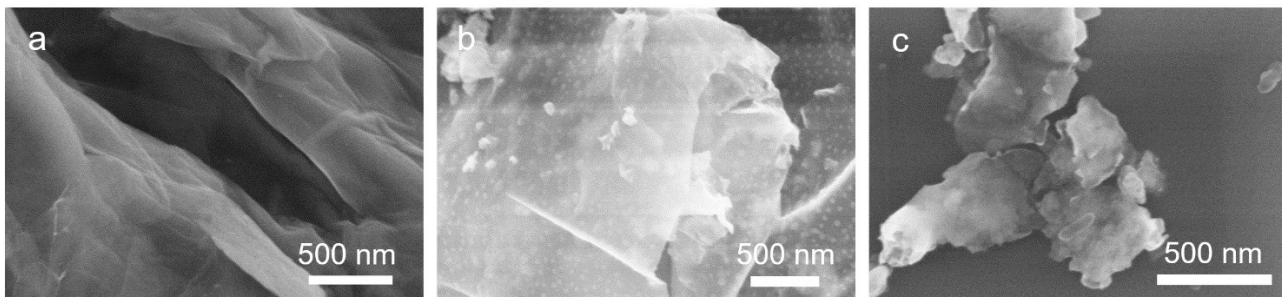

**Figure S5.** SEM images of MoS<sub>2</sub>/rGO-2 at different reaction time: (a) 0 min, (b) 2 min, and (c) 4 min.

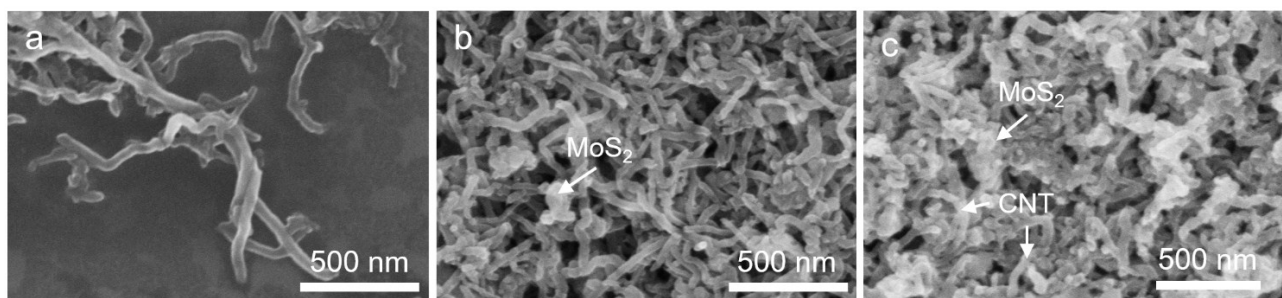

**Figure S6.** SEM images of MoS<sub>2</sub>/CNT-2 at different reaction time: (a) 0 min, (b) 2 min, and (c) 4 min.

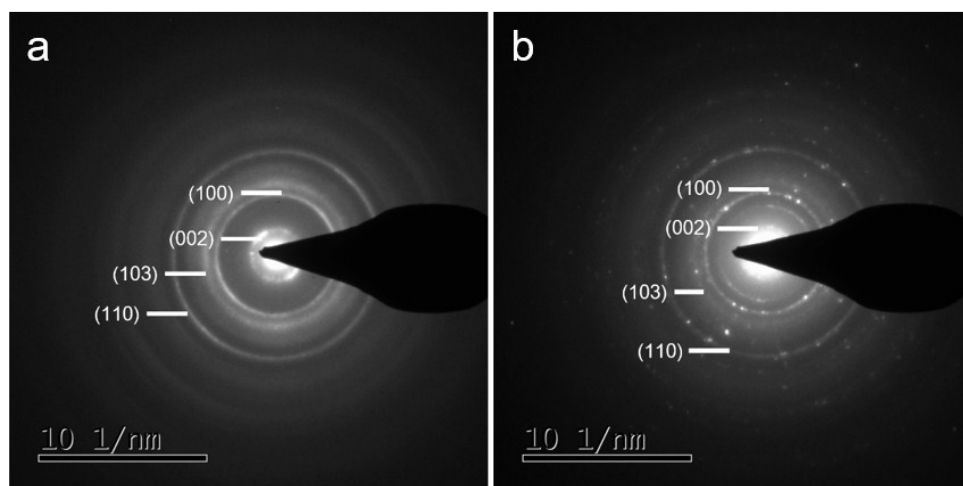

**Figure S7.** SAED patterns of (a) MoS<sub>2</sub>/rGO-2, and (b) MoS<sub>2</sub>/CNT-2.

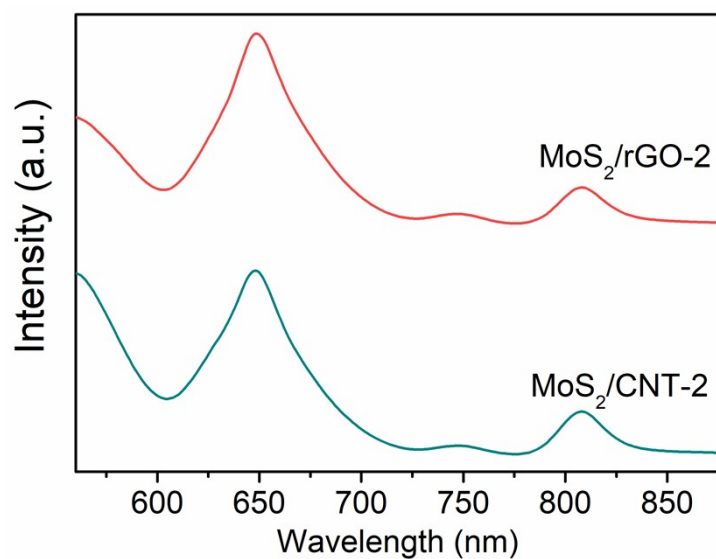

**Figure S8.** PL spectra of MoS<sub>2</sub>/rGO-2 and MoS<sub>2</sub>/CNT-2.

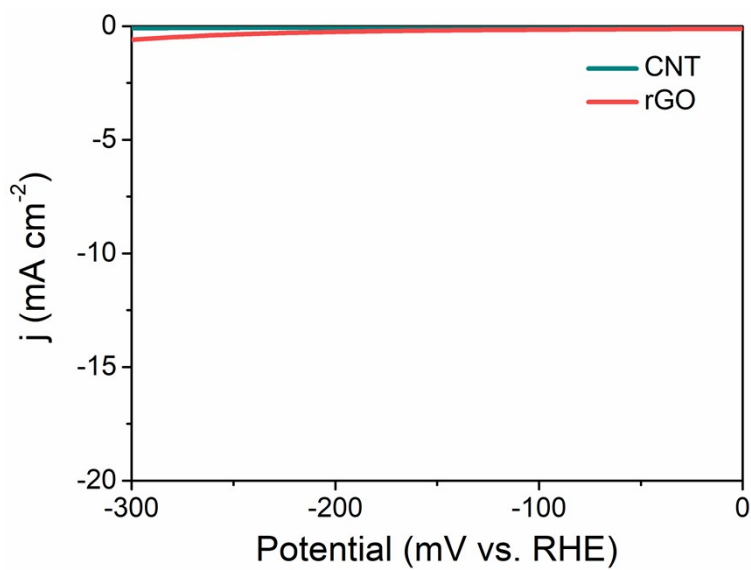

**Figure S9.** Polarization curves of CNT and rGO.

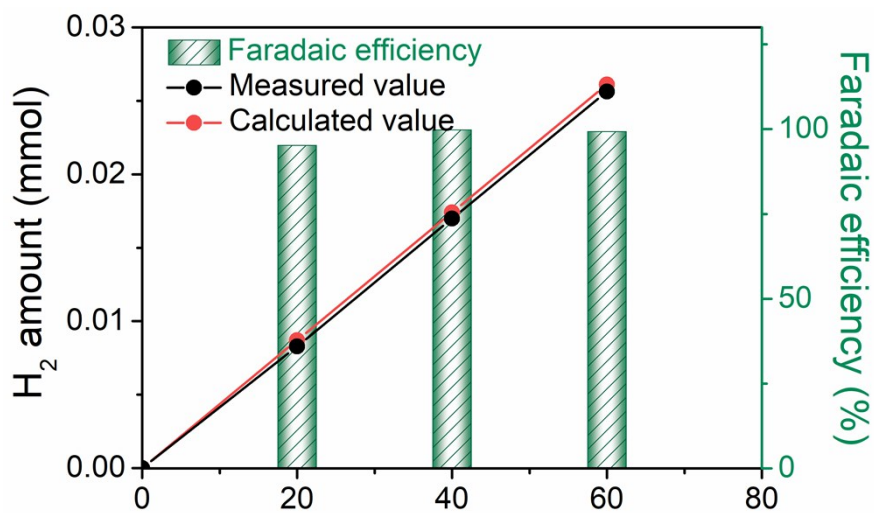

**Figure S10.** Faradaic efficiency of MoS<sub>2</sub>/CNT-2 at 20 mA/cm<sup>2</sup>.

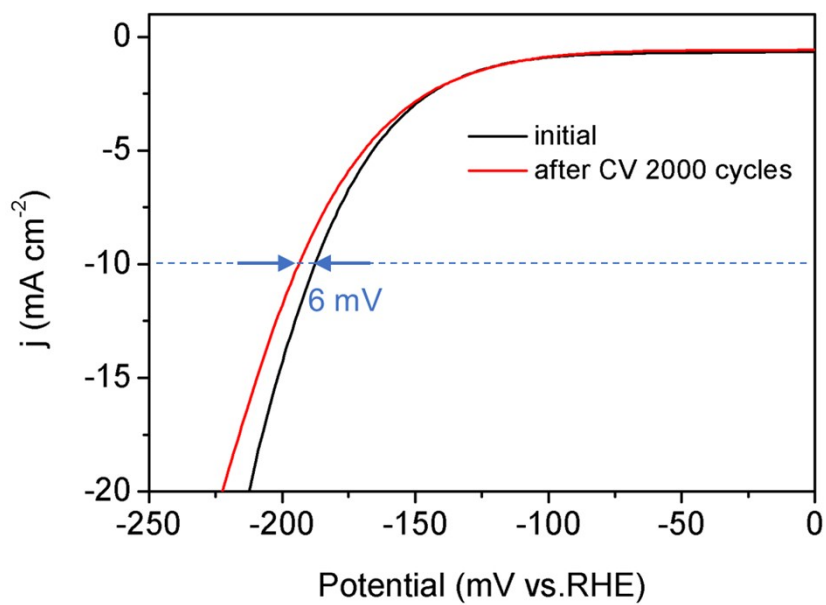

**Figure S11.** Stability test for MoS<sub>2</sub>/CNT-2.



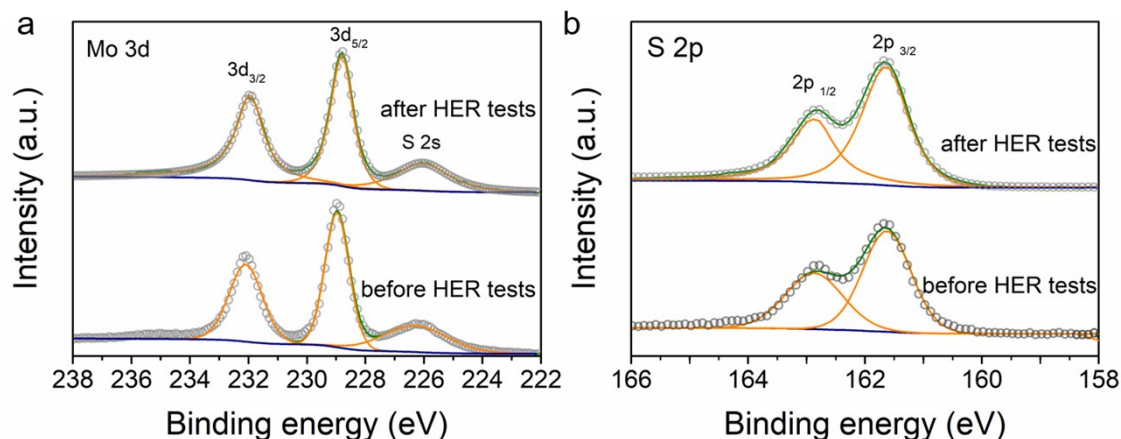

**Figure S12.** XPS spectra of (a) Mo 3d and S 2s peaks, and (b) S 2p peaks of MoS<sub>2</sub>/CNT-2 composites before and after HER tests.

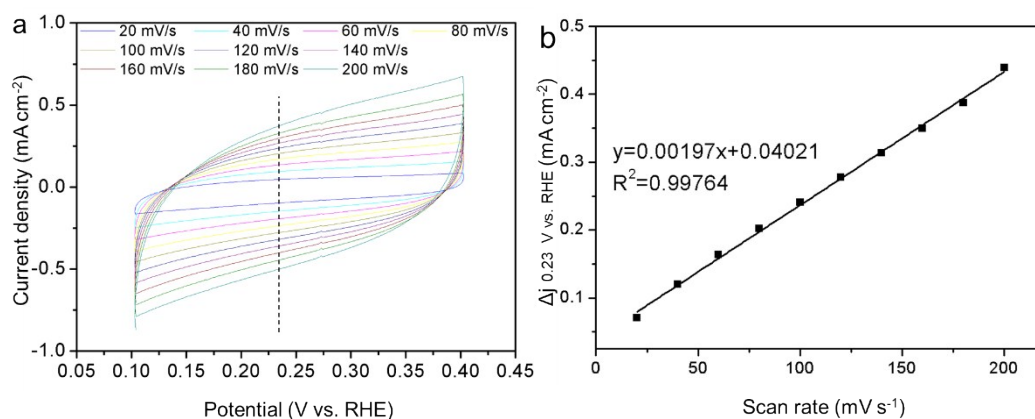

**Figure S13.** Double-layer capacitance analyses for MoS<sub>2</sub>. (a) Cyclic voltammograms in the region of 0.1–0.4 V vs. RHE at different scan rates. (b) The plots of current densities against scan rates.  $\Delta j$  is the difference between anodic and cathodic current densities at 0.23 V vs. RHE. The same parameters are used for the tests below.

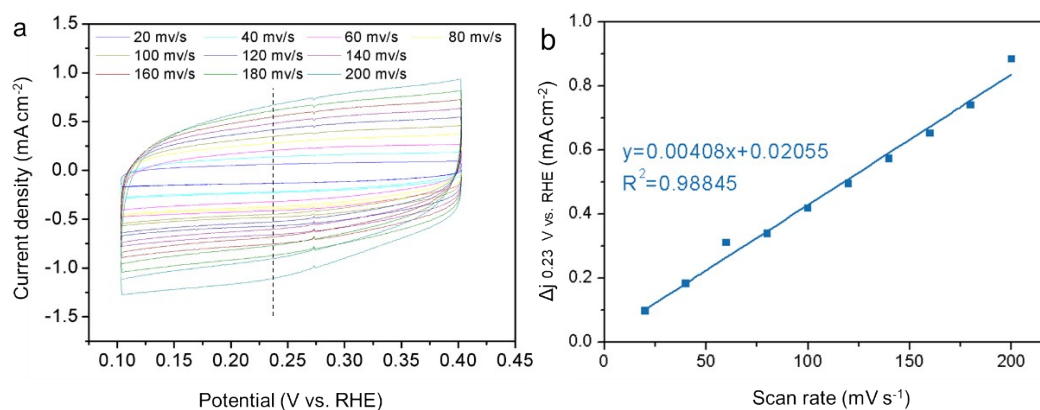

**Figure S14.** Double-layer capacitance analyses for MoS<sub>2</sub>/rGO-1.



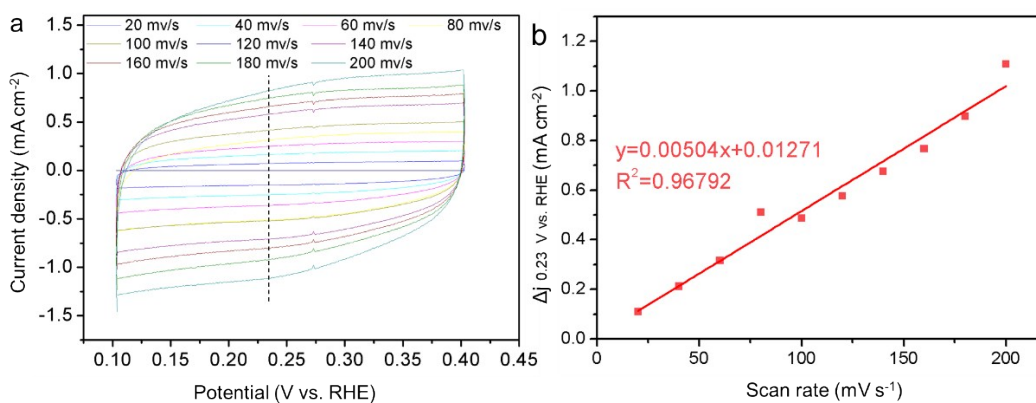

**Figure 15.** Double-layer capacitance analyses for MoS<sub>2</sub>/rGO-2.

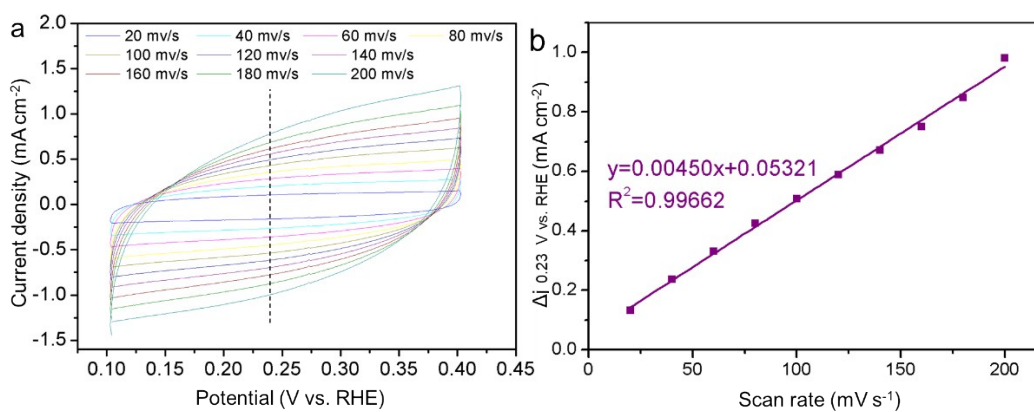

**Figure S16.** Double-layer capacitance analyses for MoS<sub>2</sub>/CNT-1.

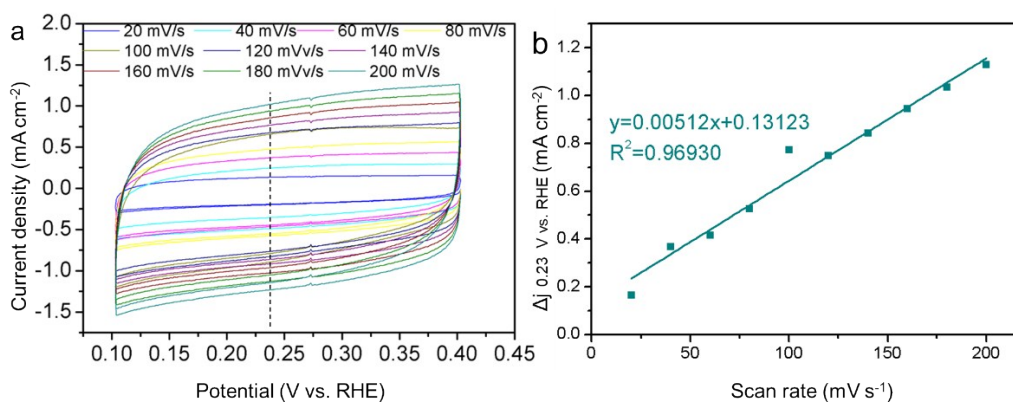

**Figure S17.** Double-layer capacitance analyses for MoS<sub>2</sub>/CNT-2.

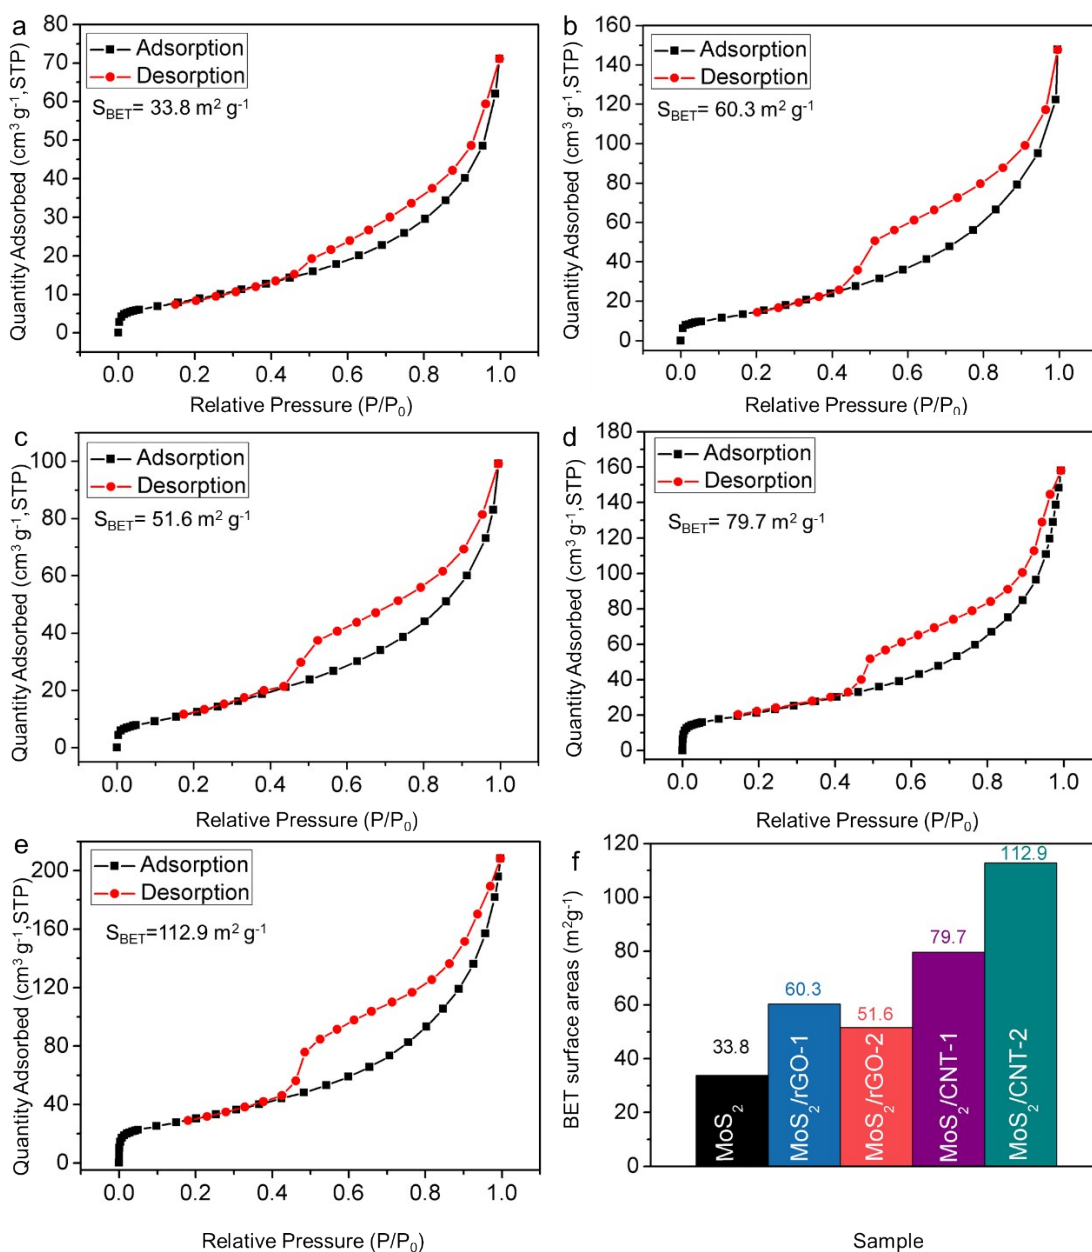

**Figure S18.** Nitrogen adsorption-desorption isotherms of (a) MoS<sub>2</sub>, (b) MoS<sub>2</sub>/rGO-1, (c) MoS<sub>2</sub>/rGO-2, (d) MoS<sub>2</sub>/CNT-1, and (e) MoS<sub>2</sub>/CNT-2. (f) BET surface areas of MoS<sub>2</sub>, MoS<sub>2</sub>/rGO-1, MoS<sub>2</sub>/rGO-2, MoS<sub>2</sub>/CNT-1 and MoS<sub>2</sub>/CNT-2 based on nitrogen adsorption-desorption isotherms.

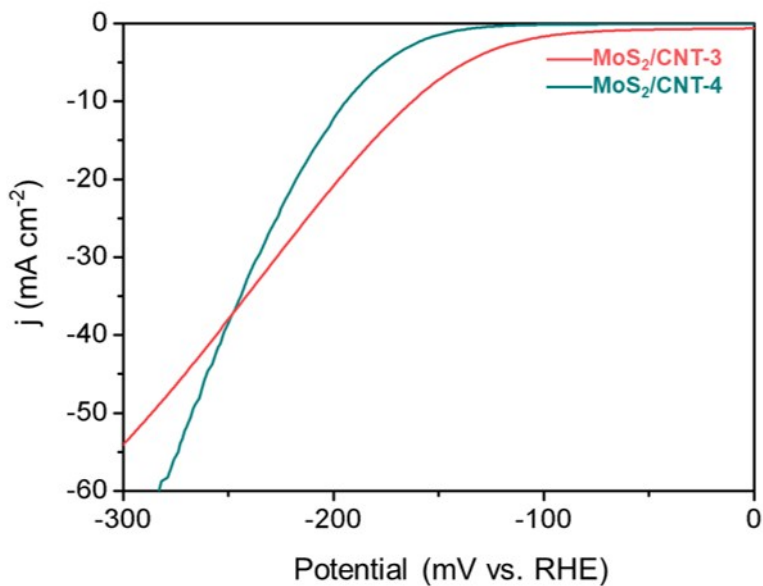

**Figure S19.** Polarization curves of MoS<sub>2</sub>/CNT-3 and MoS<sub>2</sub>/CNT-4.

As shown in **Fig. S19**, when the amount of CNTs was increased to 75 mg, the resulting products (denoted as MoS<sub>2</sub>/CNT-3) exhibit an overpotential of 163 mV. A further increase of the CNTs feeding amount to 100 mg generates MoS<sub>2</sub>/CNT-4, which has an increased overpotential of 195 mV compared to that of MoS<sub>2</sub>/CNT-3.

**Table S1** Representative top-down strategies to prepare 2D MoS<sub>2</sub>.

| Reagent                                               | Time (h) | Yield (%) | Ref. |
|-------------------------------------------------------|----------|-----------|------|
| Cetyltrimethylammonium bromide/sodium dodecyl sulfate | 8        | N/A       | 1    |
| Polyvinylpyrrolidone                                  | 9        | N/A       | 2    |
| Dimethylformamide                                     | 1        | N/A       | 3    |
| Dimethylformamide                                     | 6        | 2.5~3     | 4    |
| Methylolithium/n-butyllithium/tert-butyllithium       | 72       | N/A       | 5    |
| Chitosan                                              | 1        | 3.7       | 6    |

**Table S2** Comparison of some representative bottom-up strategies recently reported to prepare MoS<sub>2</sub>.

| <b>Molybdenum source</b>    | <b>Sulfur source</b>        | <b>Medium</b>     | <b>Time</b> | <b>Temp. (°C)</b> | <b>Ref.</b> |
|-----------------------------|-----------------------------|-------------------|-------------|-------------------|-------------|
| Sodium molybdate            | Thiourea                    | Ethanol           | 24 h        | 180               | 7           |
| Molybdenum trioxide         | Thioacetamide               | Ethanol           | 18 h        | 200               | 8           |
| Sodium molybdate            | L-cysteine                  | Ethanol,<br>water | 24 h        | 220               | 9           |
| Hexacarbonylmolybdenum      | Sulfur                      | Acetone           | 8 h         | 180               | 10          |
| Ammonium tetrathiomolybdate | Ammonium tetrathiomolybdate | Water             | 24 h        | 200               | 11          |
| Sodium molybdate            | Thiourea                    | Water             | 12 h        | 200               | 12          |
| Ammonium molybdate          | Thiourea                    | Water             | 24 h        | 200               | 13          |
| Molybdenum trioxide         | Potassium thiocyanate       | Water             | 24 h        | 210               | 14          |
| Sodium molybdate            | Thioacetamide               | Water             | 24 h        | 220               | 15          |
| Sodium molybdate            | Thiourea                    | Steam             | 5 min       | N/A               | This work   |

**Table S3** C 1s XPS results of GO and CNTs.

| <b>Sample</b>            | <b>C=C and C-C<br/>(at.%)</b> | <b>C-O<br/>(at.%)</b> | <b>C=O<br/>(at.%)</b> |
|--------------------------|-------------------------------|-----------------------|-----------------------|
| Pristine GO              | 43.1                          | 37.5                  | 19.4                  |
| GO after MSH treatment   | 62.4                          | 24.3                  | 13.3                  |
| Acid treated CNTs        | 38.8                          | 48.6                  | 12.6                  |
| CNTs after MSH treatment | 45.9                          | 38.6                  | 10.5                  |

**Table S4** Electrocatalytic performances comparison of our MoS<sub>2</sub>-carbon composites with recent related literatures.

| Substrate                           | MoS <sub>2</sub> ratio (wt%) | Overpotential (mV) | Tafel slope (mV/dec) | C <sub>dl</sub> (mF/cm <sup>2</sup> ) | Ref.                               |
|-------------------------------------|------------------------------|--------------------|----------------------|---------------------------------------|------------------------------------|
| Graphene                            | 70                           | 132                | 45                   | 32.73                                 | 16                                 |
| Graphene                            | ~ 44                         | ~ 150              | 41                   | N/A                                   | 17                                 |
| rGO                                 | 82.8                         | 156                | 44                   | ~ 65.6                                | 18                                 |
| Nitrogen-doped graphene             | N/A                          | 208                | 79                   | 28.1                                  | 19                                 |
| Sulfur-doped graphene               | 25                           | 290                | 152                  | N/A                                   | 20                                 |
| Graphene                            | 22.3                         | ~ 560              | 61                   | N/A                                   | 21                                 |
| Oxidized CNT                        | N/A                          | ~ 200              | 47                   | 31                                    | 22                                 |
| Nitrogen-doped CNTs on carbon paper | N/A                          | 160                | 36                   | N/A                                   | 23                                 |
| Acid-treated CNTs                   | N/A                          | ~ 184              | 44.6                 | N/A                                   | 24                                 |
| rGO                                 | 86.1                         | 216                | 56.66                | 4.08                                  | MoS <sub>2</sub> /rGO-1, this work |
| rGO                                 | 75.3                         | 218                | 56.76                | 5.04                                  | MoS <sub>2</sub> /rGO-2, this work |
| CNTs                                | 69.2                         | 225                | 72.99                | 4.50                                  | MoS <sub>2</sub> /CNT-1, this work |
| CNTs                                | 49.6                         | 194                | 52.70                | 5.12                                  | MoS <sub>2</sub> /CNT-2, this work |
| <sup>a</sup> CNTs                   | -                            | 163                | N/A                  | N/A                                   | MoS <sub>2</sub> /CNT-3, this work |

Note: <sup>a</sup>The feeding amount of CNTs is increased to 75 mg, and other experimental procedures are identical to that of MoS<sub>2</sub>/CNT-1 and MoS<sub>2</sub>/CNT-2. The overpotential is that at  $j = -10$  mA/cm<sup>2</sup>.

## References

1. A. Gupta, V. Arunachalam and S. Vasudevan, *J. Phys. Chem. Lett.*, 2015, **6**, 739-744.
2. J. Liu, Z. Zeng, X. Cao, G. Lu, L.-H. Wang, Q.-L. Fan, W. Huang and H. Zhang, *Small*, 2012, **8**, 3517-3522.
3. Q. D. Truong, M. Kempaiah Devaraju, Y. Nakayasu, N. Tamura, Y. Sasaki, T. Tomai and I. Honma, *ACS Omega*, 2017, **2**, 2360-2367.
4. C. Wang, D. Ren, H. S. Park, Z. Dong, Y. Yang, Q. Ren and X. Yu, *J. Alloys Compd.*, 2017, **728**, 767-772.
5. A. Ambrosi, Z. Sofer and M. Pumera, *Small*, 2015, **11**, 605-612.
6. S. Guo, Z. Qian, Z. Zhu, J. Xie, J. Fan, Q. Xu, P. Shi and Y. Min, *ChemistrySelect*, 2017, **2**, 3117-3128.
7. J. Wang, X. Zhao, Y. Fu and W. Xin, *Appl. Surf. Sci.*, 2016, **399**, 237-244.
8. X. Geng, Y. Jiao, H. Yang, A. Mukhopadhyay, Y. Lei and H. Zhu, *Adv. Funct. Mater.*, 2017, **27**.
9. Q. Pang, Y. Zhao, X. Bian, Y. Ju, X. Wang, Y. Wei, B. Liu, F. Du, C. Wang and G. Chen, *J. Mater. Chem. A*, 2017, **5**, 3667-3674.
10. L. Nan, Z. Liu, G. Qian, X. Li, R. Wang, Y. Xiao and Y. Li, *J. Mater. Sci.*, 2017, **52**, 13183-13191.
11. Z. Li, A. Ottmann, T. Zhang, Q. Sun, H. P. Meyer, Y. Vaynzof, J. Xiang and R. Klingeler, *J. Mater. Chem. A*, 2017, **5**.
12. Y. Jiang, Y. Guo, W. Lu, Z. Feng, B. Xi, S. Kai, J. Zhang, J. Feng and S. Xiong, *ACS Appl. Mater. Interfaces*, 2017, **9**, 27697-27706.
13. C. Li, J. Li, Z. Wang, S. Zhang, G. Wei, J. Zhang, H. Wang and C. An, *Inorg. Chem. Front.*, 2017, **4**, 309-314.
14. S. Liang, Z. Jiang, L. Jing, A. Pan, T. Yan, C. Tao and G. Fang, *Crystengcomm*, 2013, **15**, 4998-5002.
15. H. Lin, X. Chen, H. Li, M. Yang and Y. Qi, *Mater. Lett.*, 2010, **64**, 1748-1750.
16. Y. Li, B. He, X. Liu, X. Hu, J. Huang, S. Ye, Z. Shu, Y. Wang and Z. Li, *Int. J. Hydrogen Energy*, 2019, **44**, 8070-8078.
17. Y. Li, H. Wang, L. Xie, Y. Liang, G. Hong and H. Dai, *J. Am. Chem. Soc.*, 2011, **133**, 7296-7299.
18. S. Khazraei, M. Karimipour, M. Molaei and M. R. Moghadam, *Int. J. Hydrogen Energy*, 2019, **44**, 13284-13295.
19. D. M. Nguyen, P. D. Hai Anh, L. G. Bach and Q. B. Bui, *Mater. Res. Bull.*, 2019, **115**, 201-210.
20. A. Kagkoura, M. Pelaez-Fernandez, R. Arenal and N. Tagmatarchis, *Nanoscale Adv.*, 2019, **1**, 1489-1496.
21. L. Xu, Y. Gu, Y. Li, H. Liu, Y. Shang, Y. Zhu, B. Zhou, L. Zhu and X. Jiang, *J. Colloid Interface Sci.*, 2019, **542**, 355-362.
22. H. Huang, W. Huang, Z. Yang, J. Huang, J. Lin, W. Liu and Y. Liu, *J. Mater. Chem. A*, 2017, **5**, 1558-1566.
23. J. Ekspong, T. Sharifi, A. Shchukarev, A. Klechikov, T. Wågberg and E. Gracia-Espino, *Adv. Funct. Mater.*, 2016, **26**, 6766-6776.
24. Y. Yan, X. Ge, Z. Liu, J.-Y. Wang, J.-M. Lee and X. Wang, *Nanoscale*, 2013, **5**, 7768-7771.
